# Supplementary material for: Structures and membrane interactions of native serotonin transporter in complexes with psychostimulants
Source: PubMed Central journal article supplement (PMC10629533; doi:10.1073/pnas.2304602120), 2023-07-12
Supplement: pnas.2304602120.sapp.pdf [file pnas.2304602120.sapp.pdf]

## Supporting Information for

### Structures and membrane interactions of native serotonin transporter in complexes with psychostimulants

Dongxue Yang<sup>1,4</sup>, Zhiyu Zhao<sup>3</sup>, Emad Tajkhorshid<sup>3</sup>, and Eric Gouaux<sup>1,2,\*</sup>

1 Vollum Institute, Oregon Health & Science University, Portland, Oregon 97239, USA.

2 Howard Hughes Medical Institute, Oregon Health & Science University, Portland, Oregon 97239, USA.

3 Department of Biochemistry, NIH Center for Macromolecular Modeling and Bioinformatics, Beckman Institute for Advanced Science and Technology, and Center for Biophysics and Quantitative Biology, University of Illinois at Urbana-Champaign, Urbana, Illinois 61801, USA.

4 Present address: Department of Urology, Institute of Urology (Laboratory of Reconstructive Urology), West China Hospital, Sichuan University, Chengdu, Sichuan, China.

\*Eric Gouaux

Email: gouauxe@ohsu.edu

#### **This PDF file includes:**

Figures S1 to S8  
Table S1

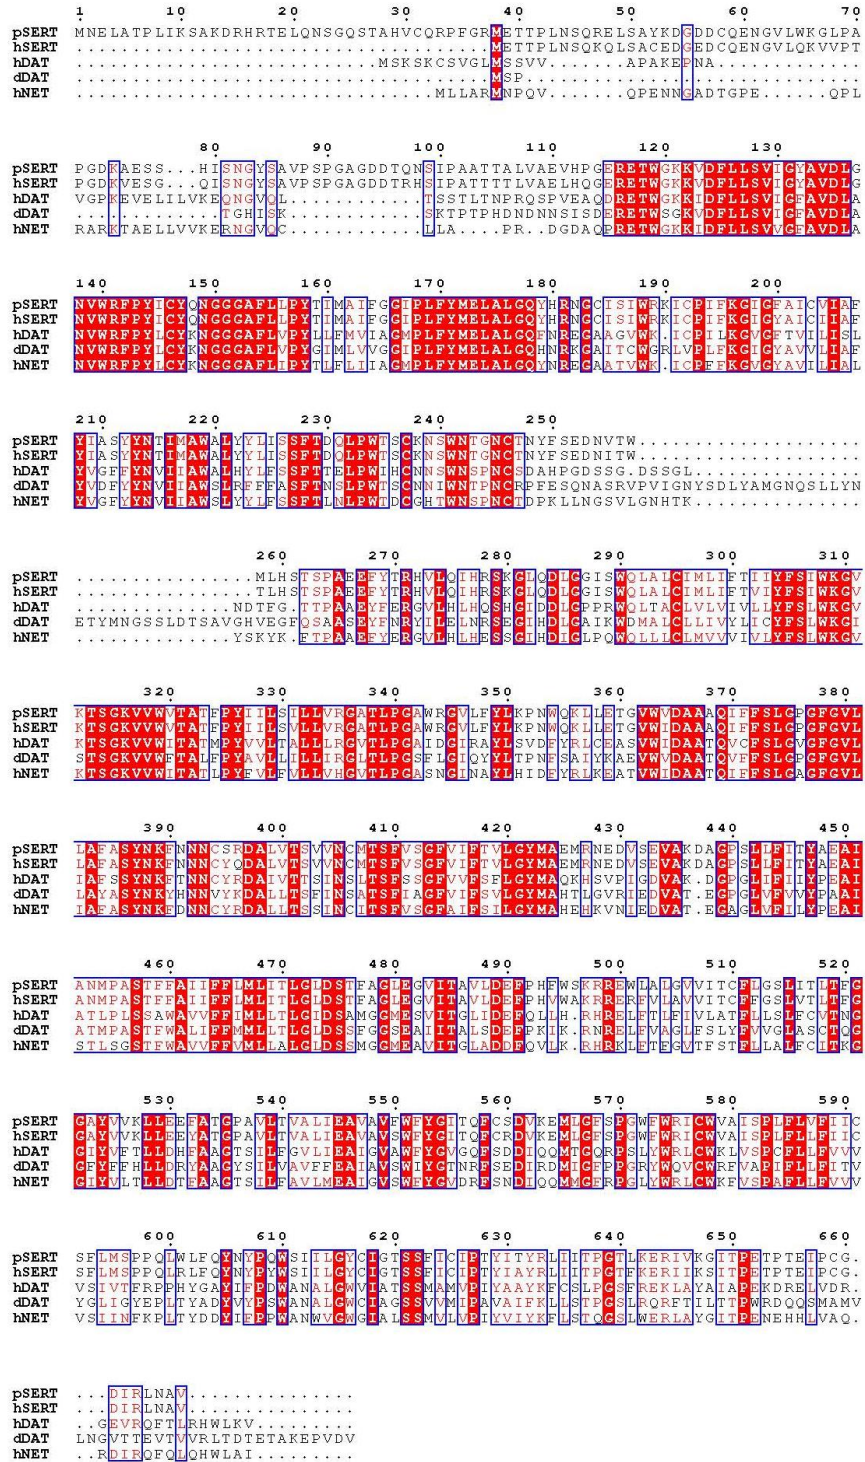

**Figure S1. Multiple sequence alignment of SERT, DAT and NET orthologues.** Residues in black are not conserved, those in red are conservatively substituted, and those in white with red background are conserved.

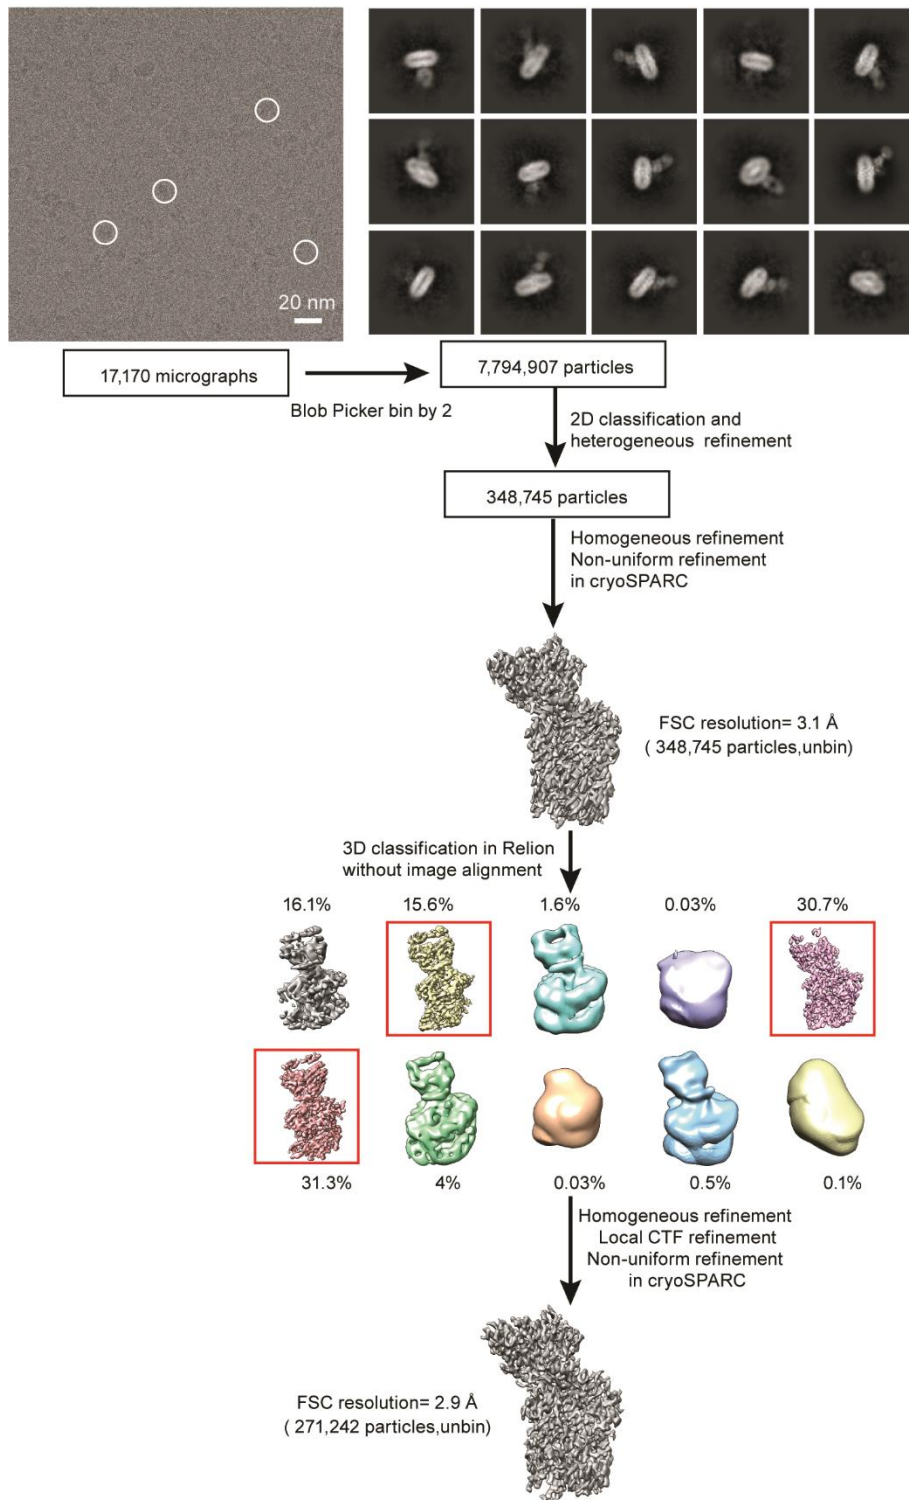

**Figure S2. 3D reconstruction of the pSERT-methamphetamine complex.** Flow chart for cryo-EM data analysis.

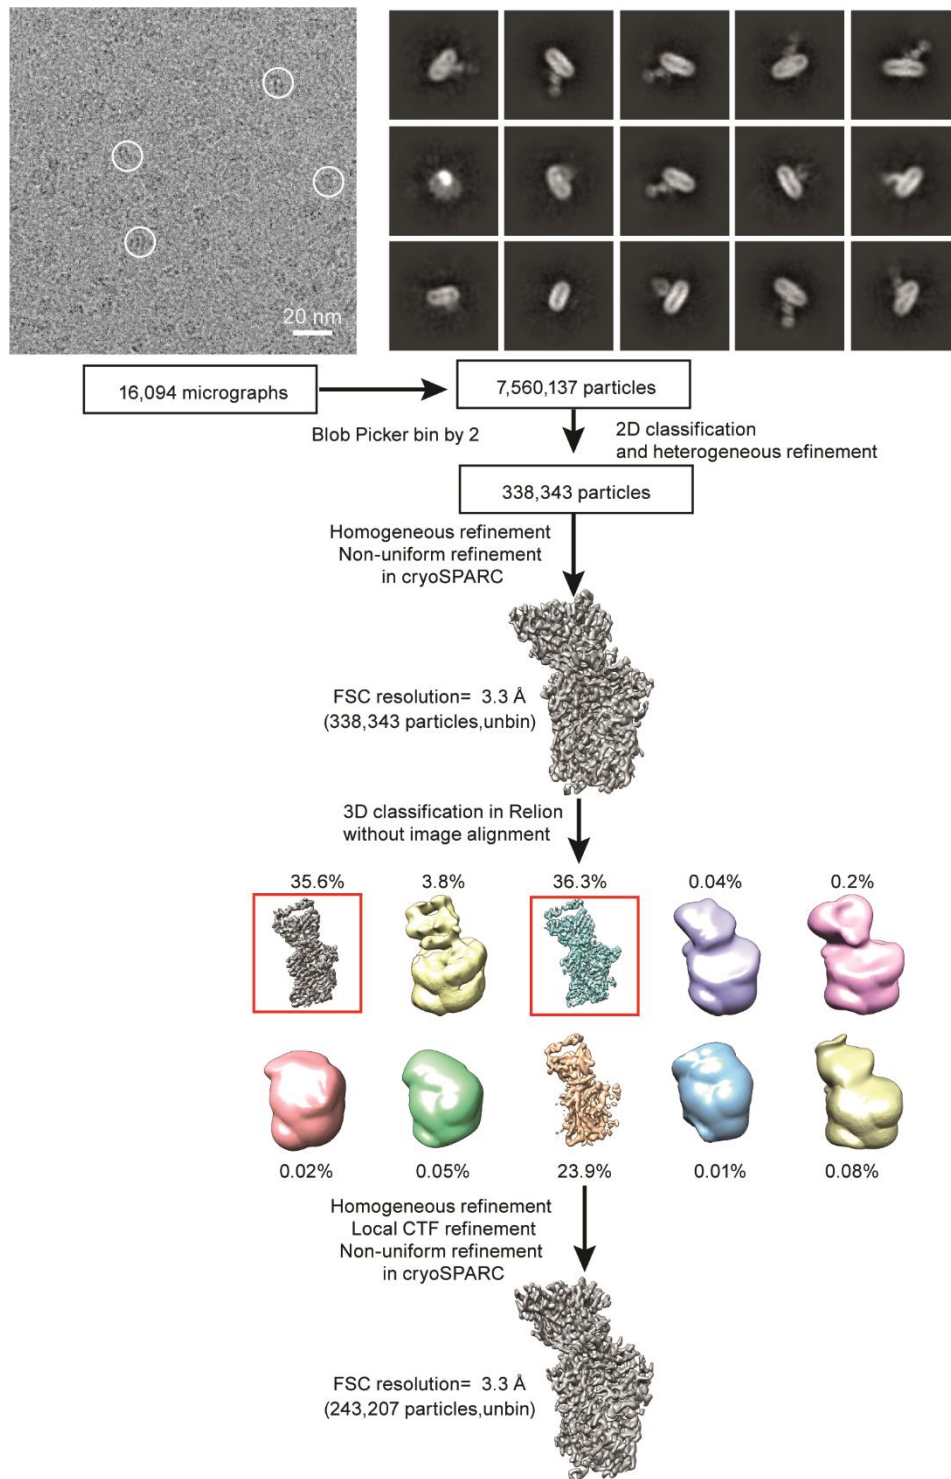

**Figure S3. Cryo-EM analysis of pSERT-cocaine complex.** Flow chart for cryo-EM data analysis.



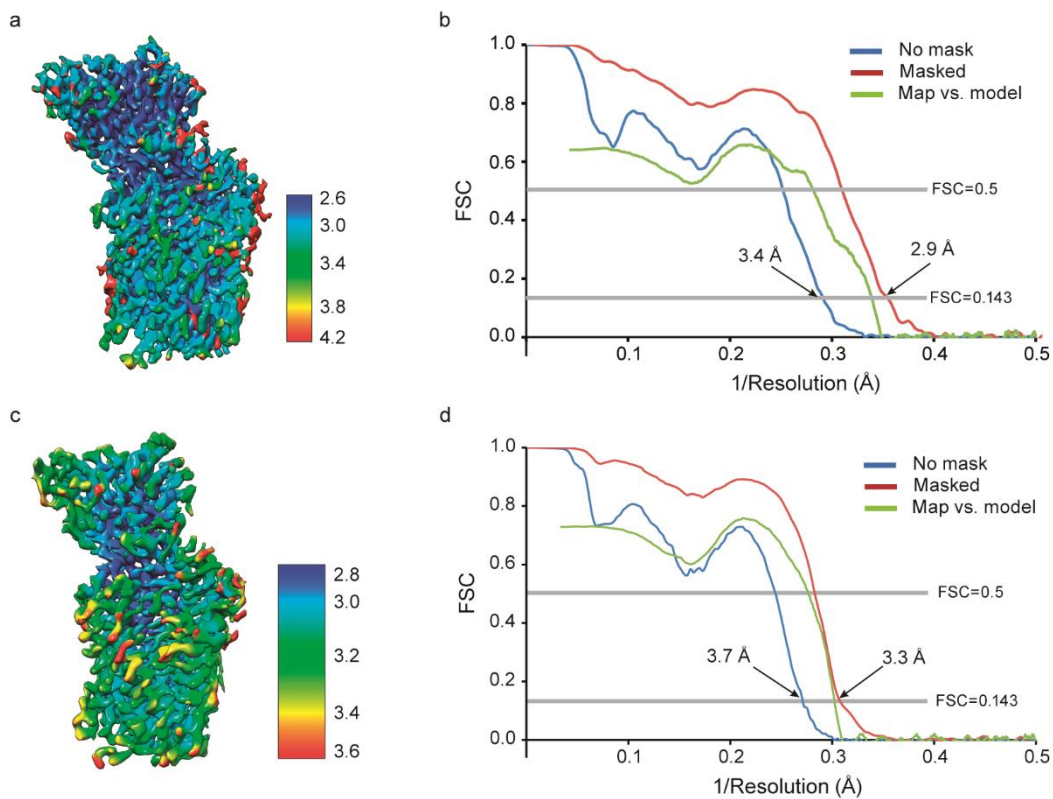

**Figure S4. Local resolution maps, overall plotted resolutions, and global map-model agreements. a** (+)-methamphetamine-pSERT Fab complex map is colored by local resolution. **b** Fourier shell correlation (FSC) curves for (+)-methamphetamine-pSERT Fab complex. **c** Local-resolution distribution of the cocaine-pSERT Fab map. **d** Map-map and map-model FSC curves for cocaine-pSERT Fab complex.

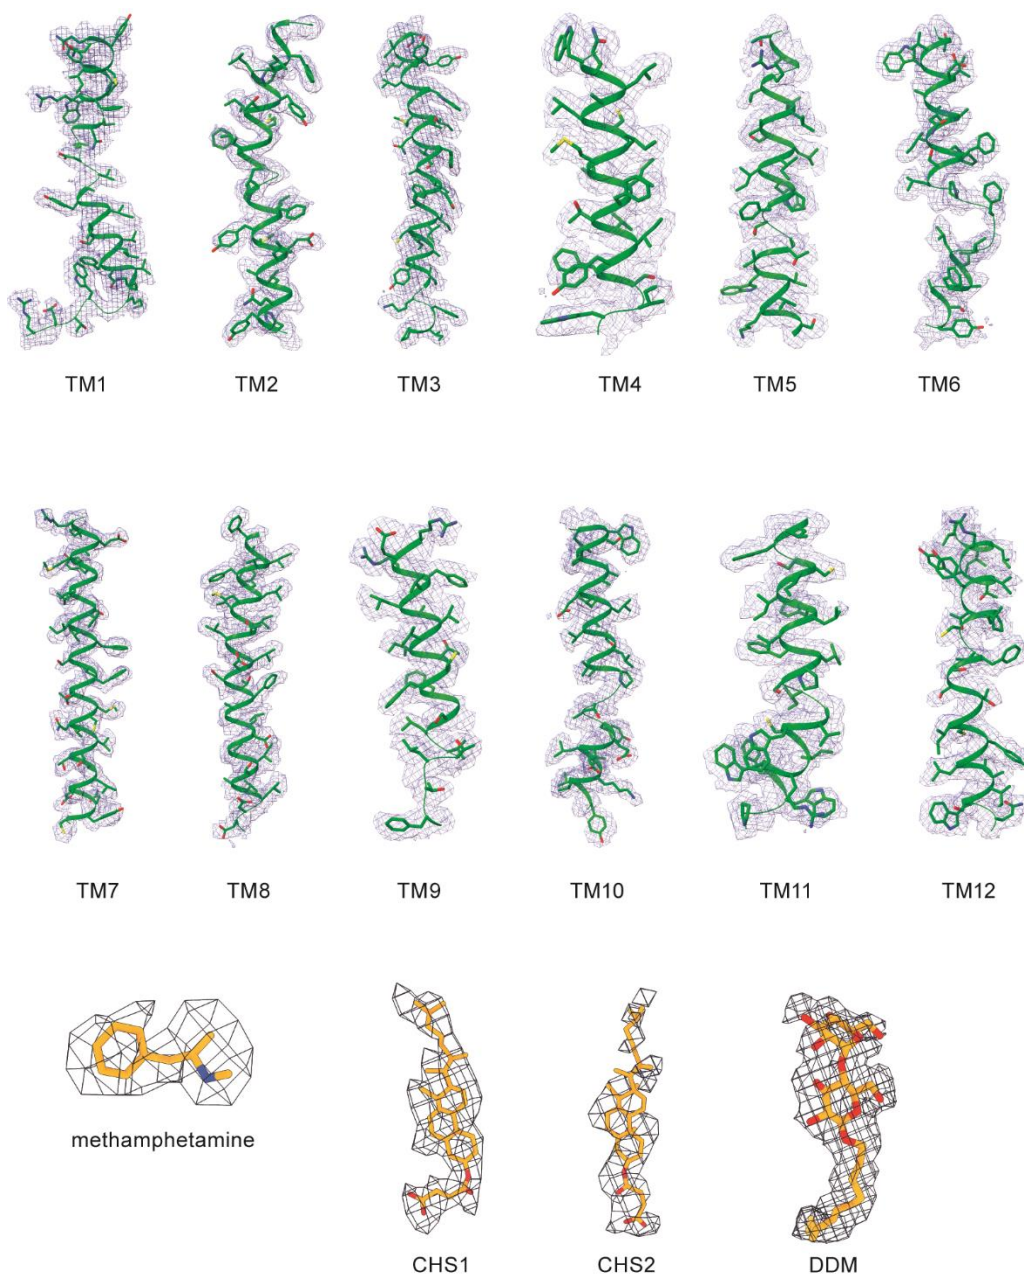

**Figure S5. Representative densities of (+)-methamphetamine-pSERT Fab complex.** Representative densities for transmembrane helices, (+)-methamphetamine cholesteryl hemisuccinate (CHS), and dodecylmaltoside (DDM).

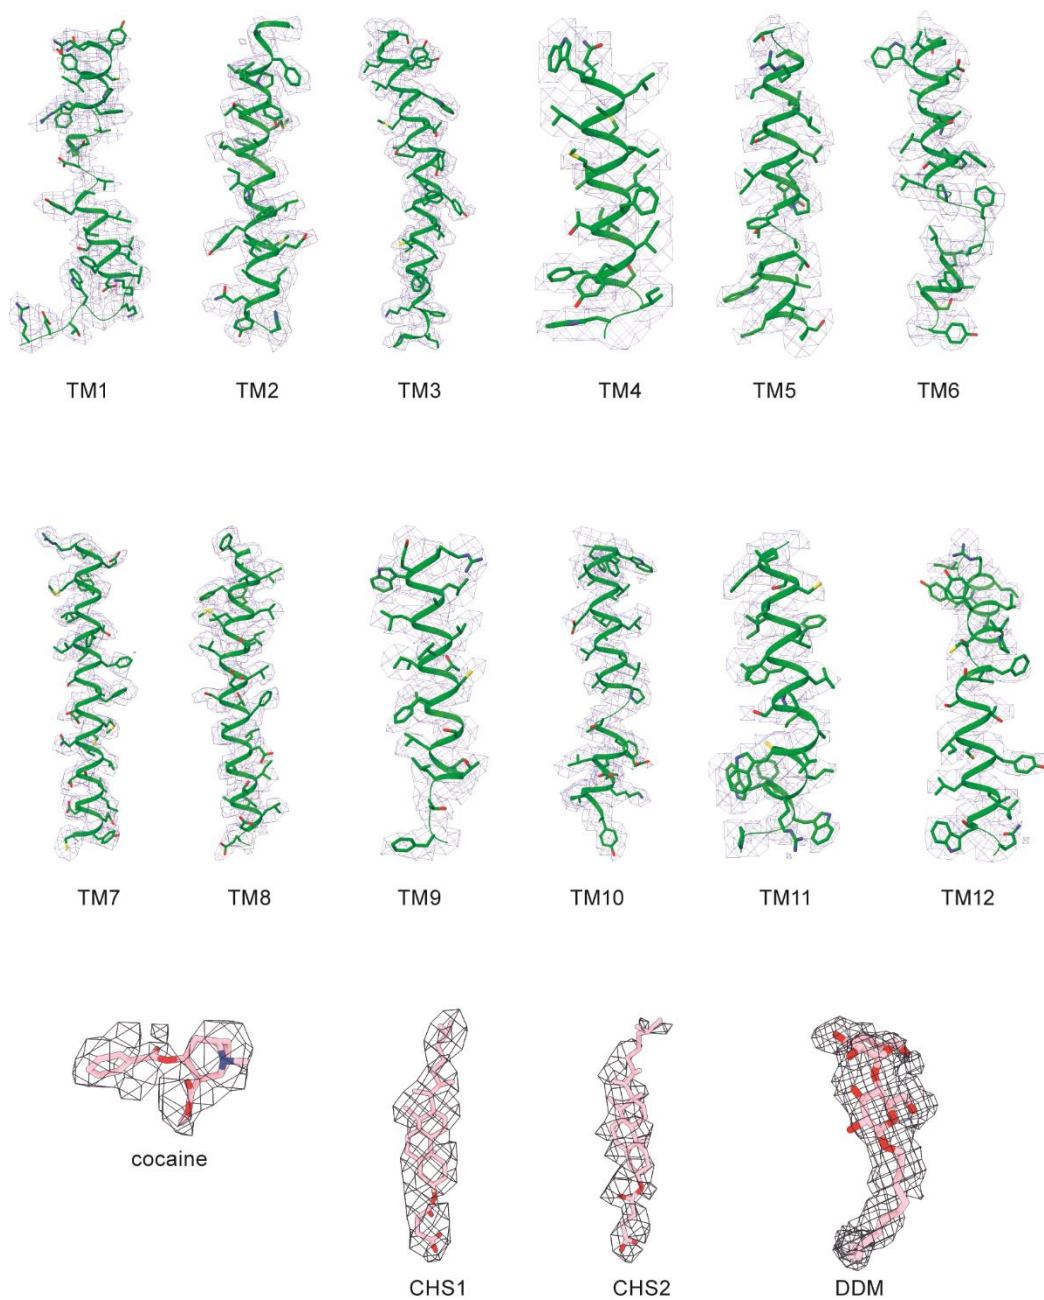

**Figure S6. Representative densities of cocaine-pSERT Fab complex.** Density fitting of transmembrane helices, cocaine, CHS, and DDM.



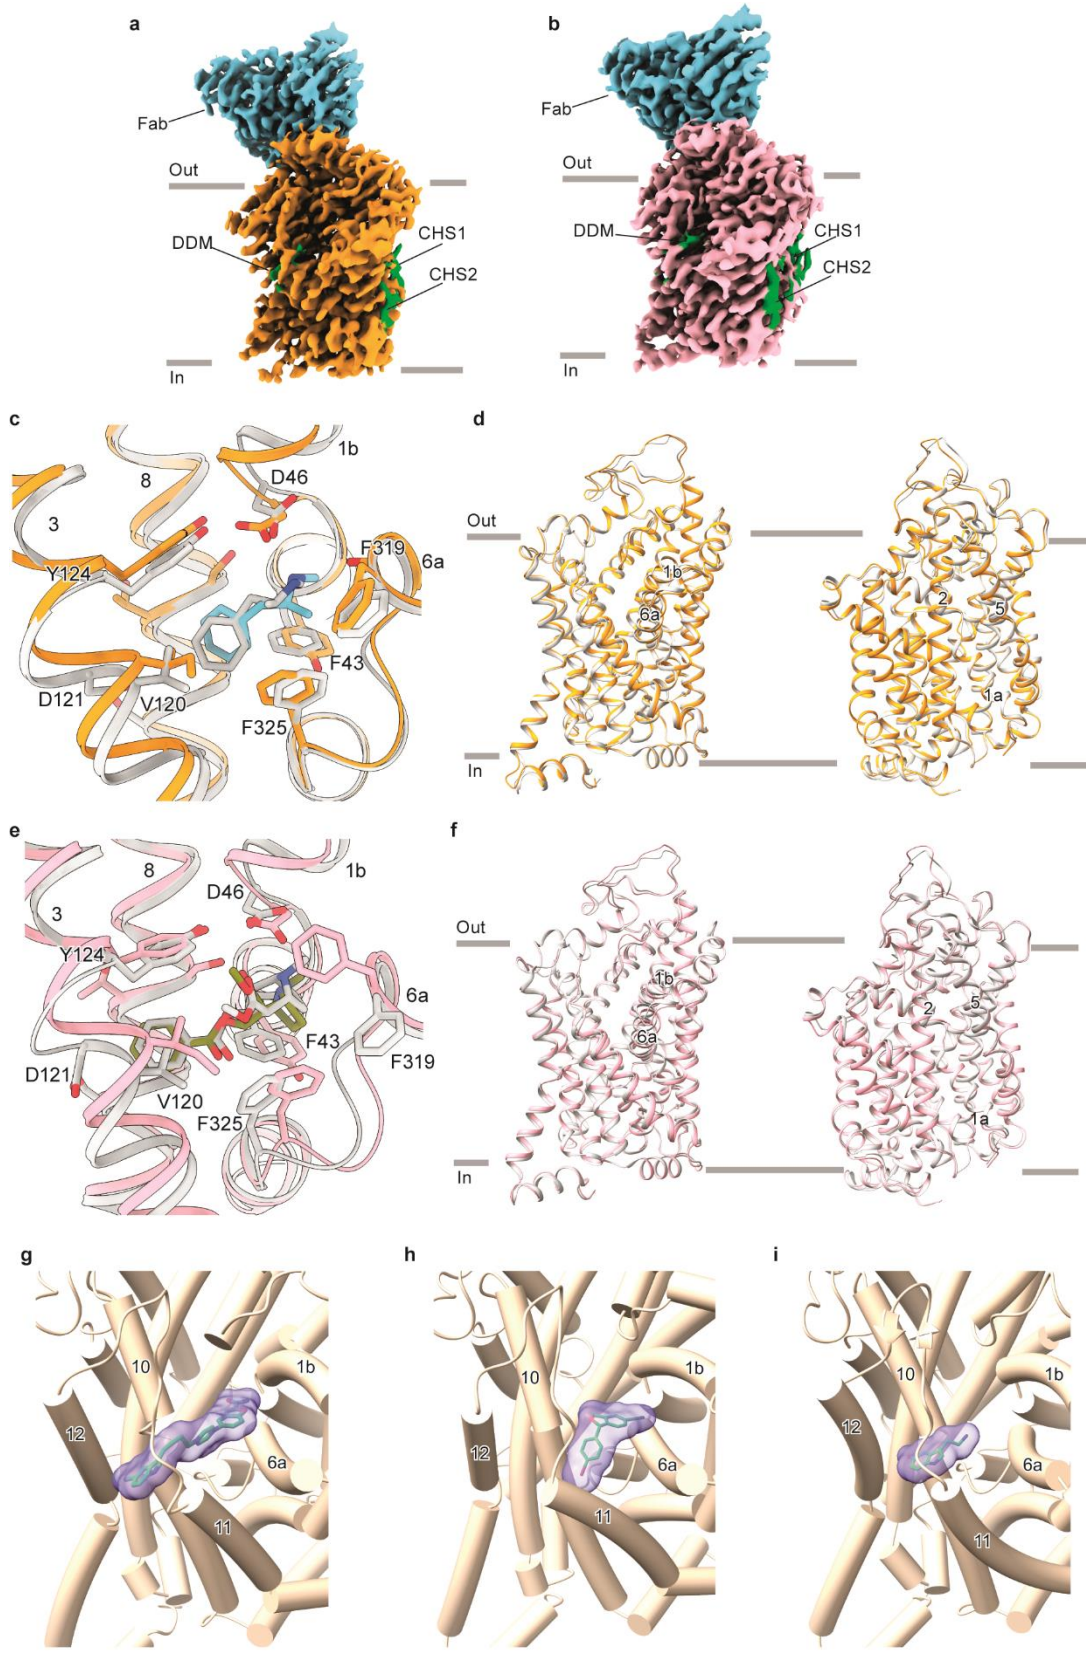



**Figure S7. The cryo-EM density maps of ligand-bound pSERT Fab complex and comparison of ligand binding in the central sites of SERT with dDAT.** **a** and **b** The cryo-EM density maps of (+)-methamphetamine-pSERT (a) and cocaine-pSERT (b) complex. **c** Superposition of the binding pockets of the (+)-methamphetamine-dDAT structure (PDB code: 4XP6) in grey with binding pockets of (+)-methamphetamine-pSERT (orange). Residues interacting with (+)-methamphetamine in dDAT have been indicated. **d** The superimposed pSERT-(+)-methamphetamine and hSERT-5-HT (outward-facing, PDB code: 7LIA). **e** Superposition of the central binding pocket of cocaine-dDAT structure (PDB code: 4XP4, grey), with central binding site of cocaine-pSERT (pink). Residues interacting with cocaine in dDAT have been indicated. **f** Structural comparison of pSERT-cocaine and hSERT-5-HT (outward-facing, PDB code: 7LIA). **g-h** Occupancy of the allosteric site by vilazodone (g), citalopram (h), and serotonin (i).

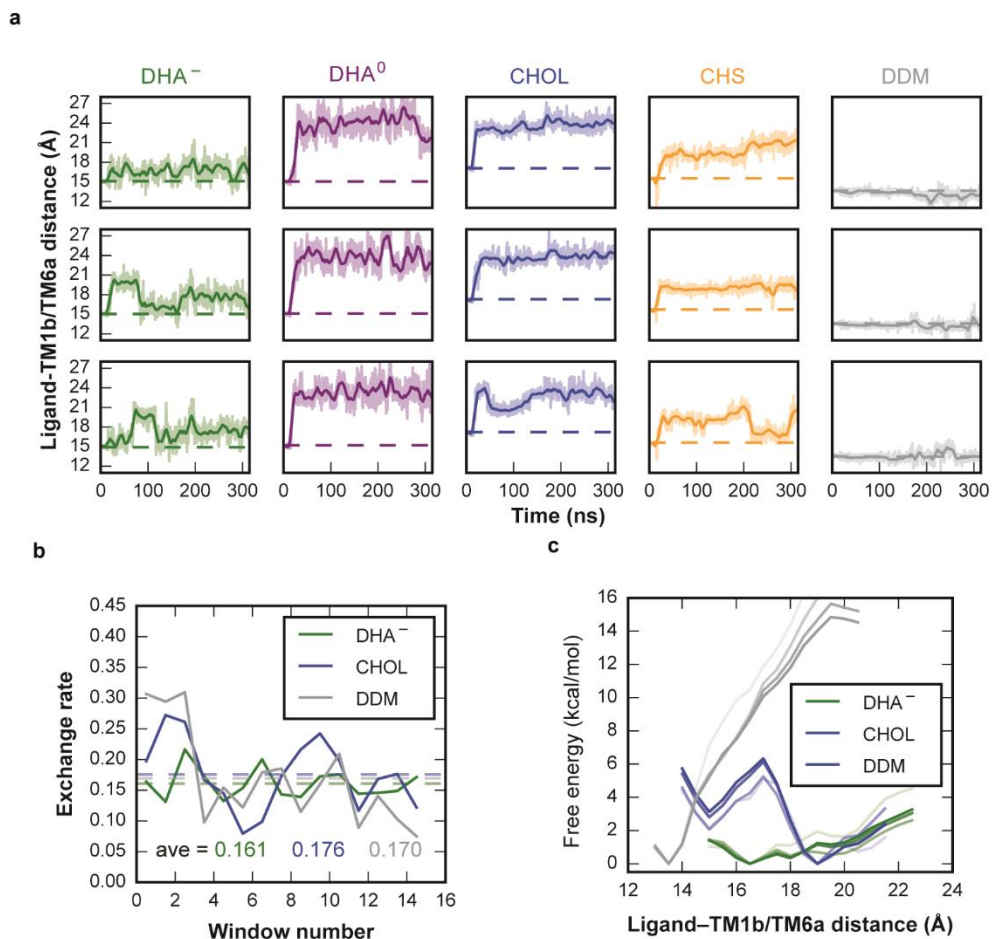

**Figure S8. Stability of lipids in the allosteric site monitored by root-mean-square deviation (RMSD) and convergence of BEUS simulations. a** Time series of ligand-TM1b/TM6a distance of the ligands at the allosteric site. Data for DHA<sup>-</sup>, DHA<sup>0</sup>, CHOL, CHS, and DDM are plotted in green, purple, blue, orange, and gray, respectively, and are shown for the three independent simulations in each case. The ligand-TM1b/TM6a distance is measured as the center-of-mass distance between heavy atoms in the ligand and C $\alpha$  atoms from TM1b and TM6a (residues 145-148 and 361-364). Dashed lines indicate the initial distances of each molecule. Plots are smoothed using a sliding window of 1 ns. **b** Exchange rates between neighboring windows monitored during the 60-ns BEUS simulations. **c** Convergence of the free energy profiles along the increase in time (10, 30, 50, and 60 ns, indicated by increasing opacities) of the simulations.

**Table S1. Supplementary Table 1 Cryo-EM data collection, refinement and validation statistics**

|                                                  | <b>SERT-methamphetamine</b><br>(EMD-)<br>(PDB ) | <b>SERT-cocaine</b><br>(EMD-)<br>(PDB) |
|--------------------------------------------------|-------------------------------------------------|----------------------------------------|
| <b>Data collection and processing</b>            |                                                 |                                        |
| Magnification                                    | 105,000                                         |                                        |
| Voltage (kV)                                     | 300                                             |                                        |
| Electron exposure (e-/Å <sup>2</sup> )           | 60                                              |                                        |
| Defocus range (µm)                               | -1.0 to -2.5                                    |                                        |
| Pixel size (Å)                                   | 0.831                                           |                                        |
| Symmetry imposed                                 | C1                                              | C1                                     |
| Initial particle images (no.)                    | 7,794,907                                       | 7,560,137                              |
| Final particle images (no.)                      | 271,242                                         | 243,207                                |
| Map resolution (Å)                               | 2.9                                             | 3.3                                    |
| FSC threshold                                    | 0.143                                           | 0.143                                  |
| Map resolution range (Å)                         | 4.2-2.6                                         | 3.6-2.8                                |
| <b>Refinement</b>                                |                                                 |                                        |
| Initial model used (PDB code)                    | 7LIA                                            | 7LIA                                   |
| Initial model CC                                 | 0.628                                           | 0.623                                  |
| Model resolution (Å)                             | 3.4                                             | 3.6                                    |
| FSC threshold                                    | 0.5                                             | 0.5                                    |
| Map sharpening <i>B</i> factor (Å <sup>2</sup> ) | -95.3                                           | -103.1                                 |
| <b>Model composition</b>                         |                                                 |                                        |
| Non-hydrogen atoms                               | 6188                                            | 6199                                   |
| Protein residues                                 | 769                                             | 769                                    |
| Ligands (atoms)                                  | 116                                             | 127                                    |
| <b><i>B</i> factors (Å<sup>2</sup>)</b>          |                                                 |                                        |
| Protein                                          | 59                                              | 29                                     |
| Ligand                                           | 77                                              | 36                                     |
| <b>R.m.s. deviations</b>                         |                                                 |                                        |
| Bond lengths (Å)                                 | 0.002                                           | 0.002                                  |
| Bond angles (°)                                  | 0.631                                           | 0.505                                  |
| <b>Validation</b>                                |                                                 |                                        |
| Refined model CC                                 | 0.680                                           | 0.684                                  |
| MolProbity score                                 | 2.15                                            | 1.55                                   |
| Clashscore                                       | 8.76                                            | 6.79                                   |
| Poor rotamers (%)                                | 4.35                                            | 0.00                                   |
| <b>Ramachandran plot</b>                         |                                                 |                                        |
| Favored (%)                                      | 96.85                                           | 96.97                                  |
| Allowed (%)                                      | 3.15                                            | 3.03                                   |
| Disallowed (%)                                   | 0                                               | 0                                      |
